# Supplementary material
Source: publisher figshare collection journal article supplement (https://adisjournals.figshare.com/ndownloader/files/37438387)
Supplement: Supplementary file 1 [file 37438387]

## Vosoritide : Adis Evaluation

### Clinical Considerations

- First precision therapy approved for achondroplasia
- Significantly increases annualized growth velocity and height Z-score relative to placebo, without worsening upper to lower body segment ratio
- Growth-promoting effects maintained for up to 60 months of treatment
- Generally well tolerated

### Plain Language Summary

#### *Background and rationale*

- Achondroplasia is the most common form of skeletal dysplasia that is characterized by short stature with disproportionate bone growth
- The condition is caused by a gain-of-function mutation in the gene for fibroblast growth factor receptor 3 (FGFR3), which is a negative regulator of bone growth
- With increased understanding of the pathogenesis of achondroplasia, vosoritide (Voxzogo®), a modified recombinant human C-type natriuretic peptide (CNP) analogue, has been approved as the first precision therapy for the treatment of achondroplasia in patients aged  $\geq 2$  years with open epiphyses in the EU and those aged  $\geq 5$  years with open epiphyses in the USA

#### *Clinical findings*

- In children with achondroplasia, daily subcutaneous administration of vosoritide was associated with growth-promoting effects
- Vosoritide is generally well tolerated, with most adverse events being mild in severity

#### *Conclusion*

Vosoritide is a valuable, effective and generally well-tolerated treatment option for children with achondroplasia

This plain language summary represents the opinions of the author. For a full list of declarations, including funding and author disclosure statements, and copyright information, please see the full text online. © Springer Nature Switzerland AG 2022.
